# Supplementary material for: A study of lithic refitting and the Middle Palaeolithic prepared core technology in South Bihar, India
Source: Research Square preprint supplement (doi:10.21203/rs.3.rs-5974142/v1), 2025-02-10
Supplement: Supplementary file 1 [file f6d66dcb917a6c46eaa88c54.docx]

| **Cluster locality name** | **Latitude** | **Longitude** |
| --- | --- | --- |
| Gurmha (GMA) cluster | 25.08836111 | 86.33027778 |
| Sohdihwa (SOH) cluster | 25.06958 | 86.39754 |
| Sohdihwa (SOH) site | 25.0692 | 86.39692 |
| Chormara Camp (CMA) cluster | 25.10855 | 86.36961 |
| Parsatari cluster 1 | 25.12009 | 86.3713 |
| Parsatari cluster 2 | 25.12007 | 86.37133 |
| Parsatari cluster 3 | 25.1201 | 86.37134 |
| Bhorbhandari | 25.11723333 | 86.36235 |
| Jahbha | 25.115913 | 86.355752 |

**Table 1** Location of clusters and sites


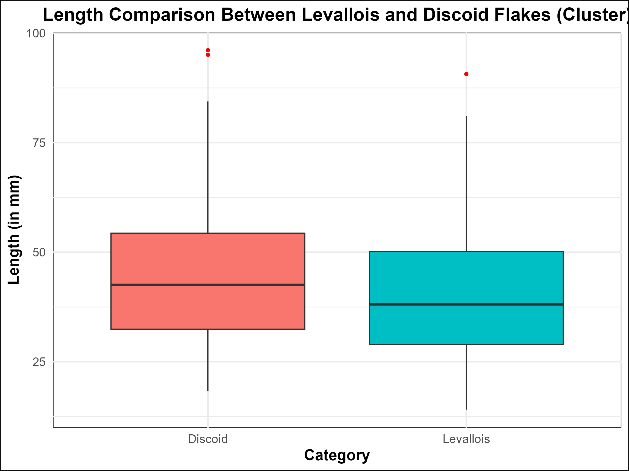


**Fig. 1** Boxplot depicting t-test analysis of Levallois and discoid flake length


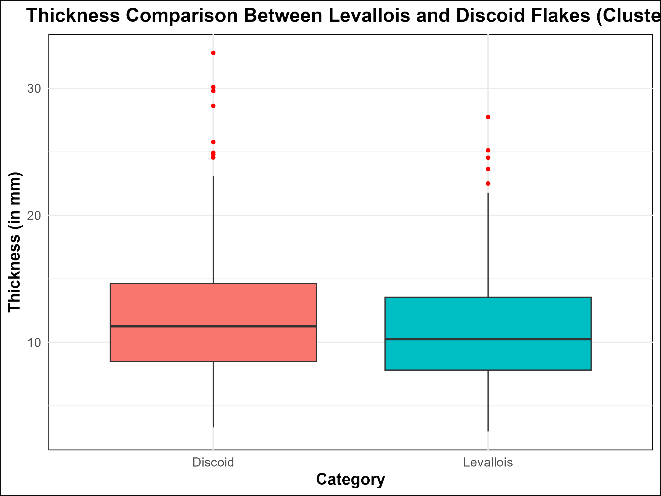


**Fig. 2** Boxplot depicting t-test analysis of Levallois and discoid flake width


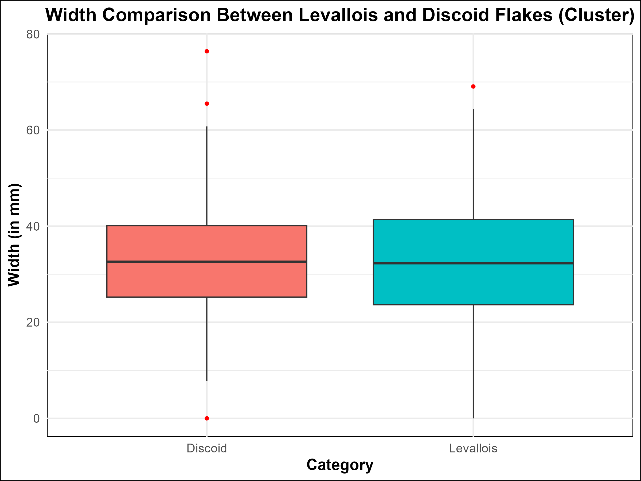


**Fig. 3** Boxplot depicting t-test analysis of Levallois and discoid flake thickness
